# Supplementary material
Source: Springer Nature journal article supplement (https://www.springermedizin.de/resource/supplementary/12936_2012_2173_MOESM8_ESM.pdf/9542802)

Per-capita funding relative to line of equity

25x  
10x  
5x  
2x  
0  
0.5x  
0.25x  
0.1x

External Funding  
(as percentage)  
Government Funding  
(as percentage)

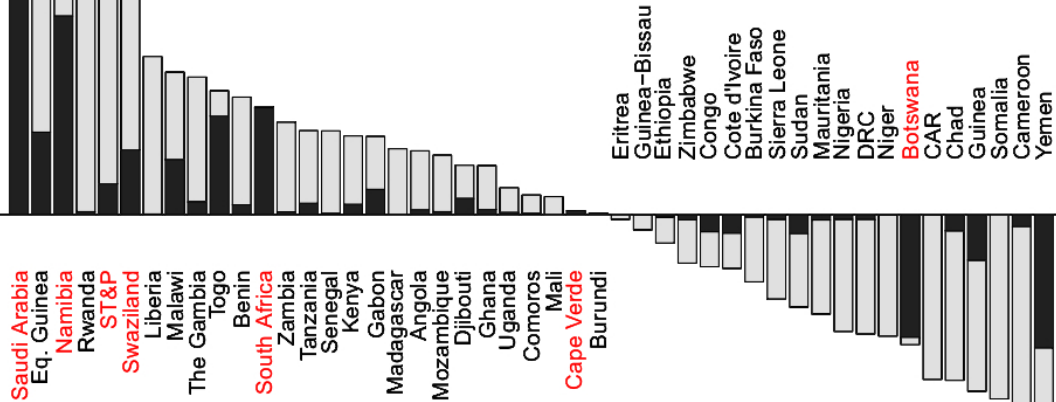

Supplement: MOESM8 [file 9542802]
